# Supplementary material for: Widespread expansion of tree cover compromises European biodiversity capacity
Source: Research Square preprint supplement (doi:10.21203/rs.3.rs-6427353/v1), 2025-06-06
Supplement: Supplementary file 1 [file b2575b0527cbde205691bec4.docx]

Supplementary Material for

Patterns, drivers and potential biodiversity consequences of widespread tree-cover expansion in Europe

Wanben Wu*, Jens-Christian Svenning, Tobias Kuemmerle, Alexander V. Prishchepov, Matthias Baumann, Robert Buitenwerf

*Corresponding author: [wanben.wu@bio.au.dk](about:blank)

Table of contents

[***Table S1****: Accuracy assessment for annual cropland extent maps in Europe* 6](#_Toc194674618)

[***Fig. S1****: Tree dynamic modes across biogeographic regions and countries.* 7](#_Toc194674619)

[***Fig. S2****: The relationship between TC and TCI, THI* 8](#_Toc194674620)

[***Fig. S3****: Sub-metrics of tree metrics trends from 2001 to 2021* 9](#_Toc194674621)

[***Fig. S4****: Average tree cover, tree cover connectivity index, and tree heterogeneity index, 2001-2021* 10](#_Toc194674622)

[***Fig. S5****: Two sub-metrics of tree heterogeneity trends across different land managements.* 10](#_Toc194674623)

[***Fig. S6****: Partial dependence plots for the factors affecting the TC trend from 2001 to 2021* 11](#_Toc194674624)

[***Fig. S7****: Partial dependence plots for the factors affecting the TCI trend from 2001 to 2021* 11](#_Toc194674625)

[***Fig. S8****: Partial dependence plots for the factors affecting the THI trend from 2001 to 2021* 12](#_Toc194674626)

[***Fig. S9****: Distribution of former cropland and its comparison with cropland area reduction* 13](#_Toc194674627)

[***Fig. S10****: Correlation coefficients among different tree metrics metrics trends* 14](#_Toc194674628)

[***Fig. S11****: Correlation coefficients among determinant factors* 15](#_Toc194674629)

[***Fig. S12****: Workflow for assessing tree dynamics and their determinants across Europe.* 16](#_Toc194674630)

# ***Table S1****:**Accuracy assessment for annual cropland extent maps in Europe*

Derived from ESA-CCI-LC data using GLANCE training data. Here, OA, PA, and UA denote overall accuracy, producer accuracy, and user accuracy, respectively. Where n represents the number of crop samples utilized for the assessment, an equivalent sample size of non-crop samples has also been employed.

| Year | OA | PA | UA | n |
| --- | --- | --- | --- | --- |
| 1999 | 0.85 | 0.90 | 0.82 | 2422 |
| 2000 | 0.86 | 0.91 | 0.82 | 2527 |
| 2001 | 0.85 | 0.91 | 0.82 | 2568 |
| 2002 | 0.85 | 0.91 | 0.81 | 2624 |
| 2003 | 0.86 | 0.91 | 0.82 | 2678 |
| 2004 | 0.85 | 0.91 | 0.82 | 2688 |
| 2005 | 0.85 | 0.91 | 0.82 | 2723 |
| 2006 | 0.85 | 0.91 | 0.81 | 2695 |
| 2007 | 0.85 | 0.91 | 0.82 | 2691 |
| 2008 | 0.86 | 0.90 | 0.83 | 2689 |
| 2009 | 0.90 | 0.95 | 0.86 | 30481 |
| 2010 | 0.86 | 0.90 | 0.83 | 2822 |
| 2011 | 0.86 | 0.91 | 0.83 | 2707 |
| 2012 | 0.89 | 0.96 | 0.85 | 40333 |
| 2013 | 0.86 | 0.91 | 0.83 | 2641 |
| 2014 | 0.86 | 0.91 | 0.82 | 2632 |
| 2015 | 0.87 | 0.94 | 0.83 | 43488 |
| 2016 | 0.85 | 0.91 | 0.82 | 2619 |
| 2017 | 0.86 | 0.91 | 0.82 | 2604 |
| 2018 | 0.85 | 0.94 | 0.80 | 39529 |
| 2019 | 0.81 | 0.89 | 0.77 | 444 |
| 2020 | 0.80 | 0.89 | 0.76 | 386 |
| mean | 0.86 | 0.91 | 0.82 | - |


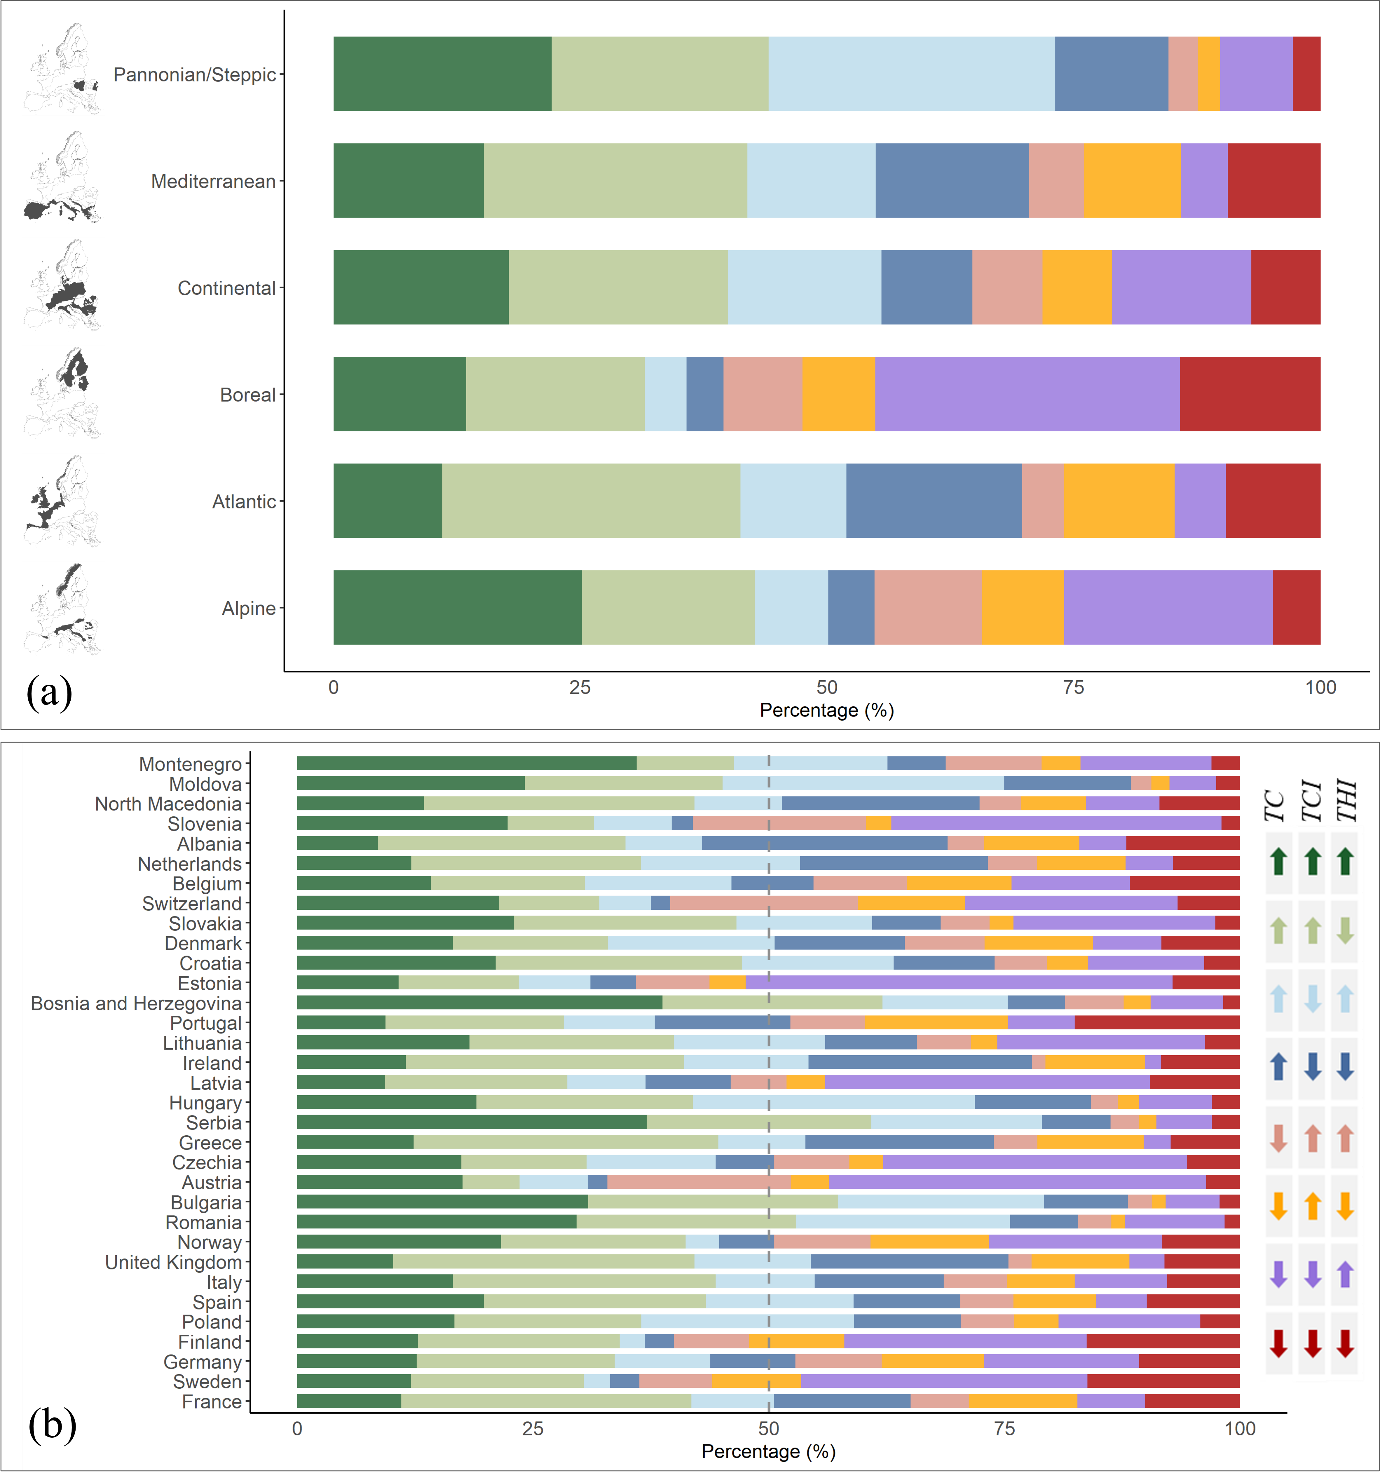


# ***Fig. S1****: Tree dynamic modes across biogeographic regions and countries.*

*(a) shows the fraction of each dynamic mode for different biogeographic regions, while (b) presents the corresponding fractions for individual countries.*


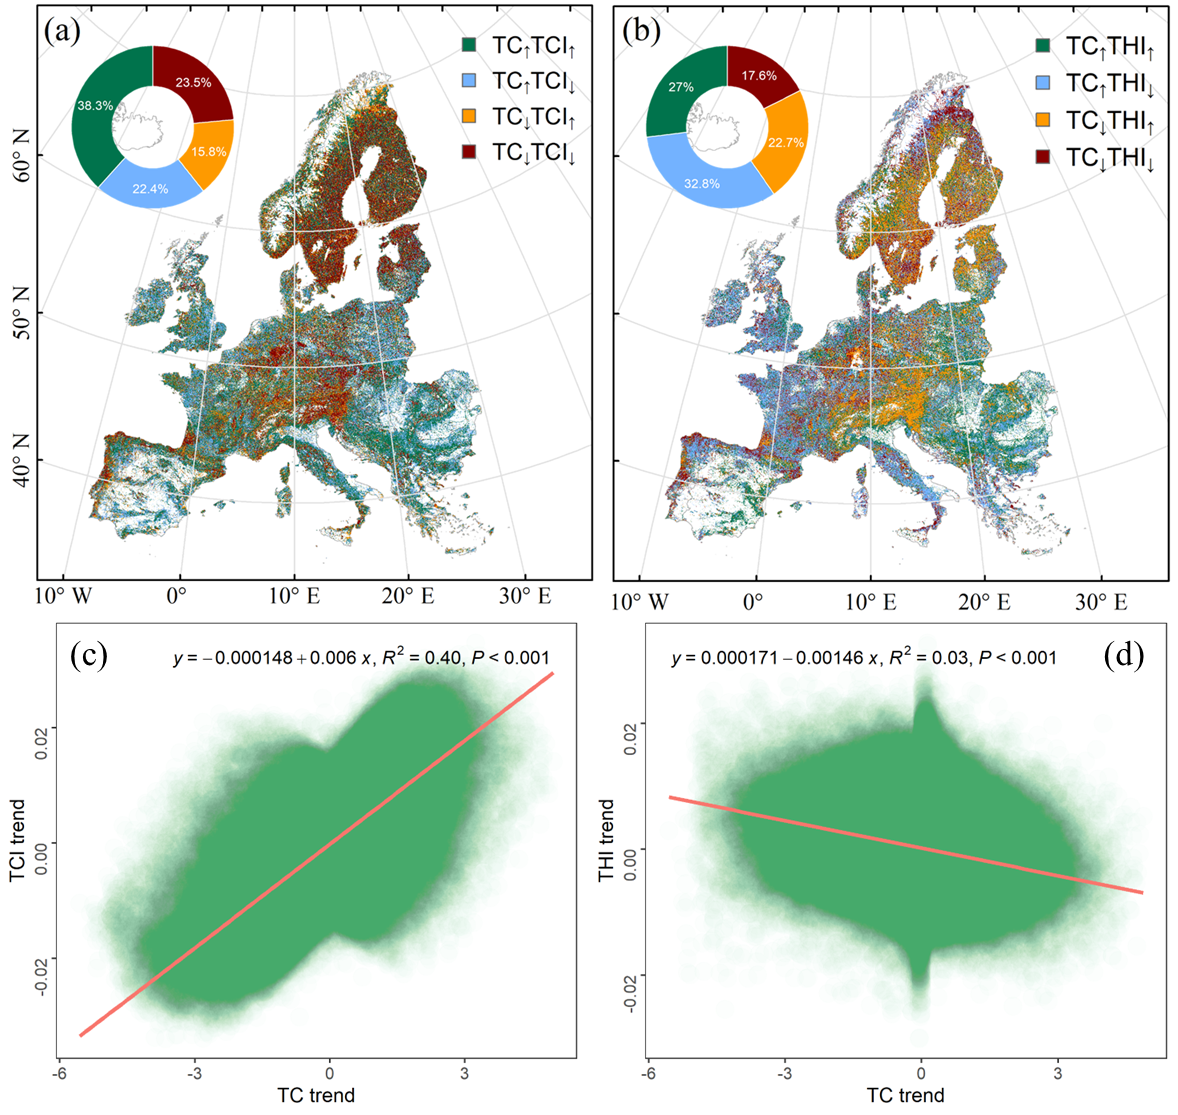


# ***Fig. S2****: The relationship between TC and TCI, THI*

*(a) four tree dynamic modes based on the trends of TC and TCI, (b) four tree dynamic modes based on the trends of TC and THI. (c) the linear relationship between trends in TC and TCI, (d) TC and THI.*


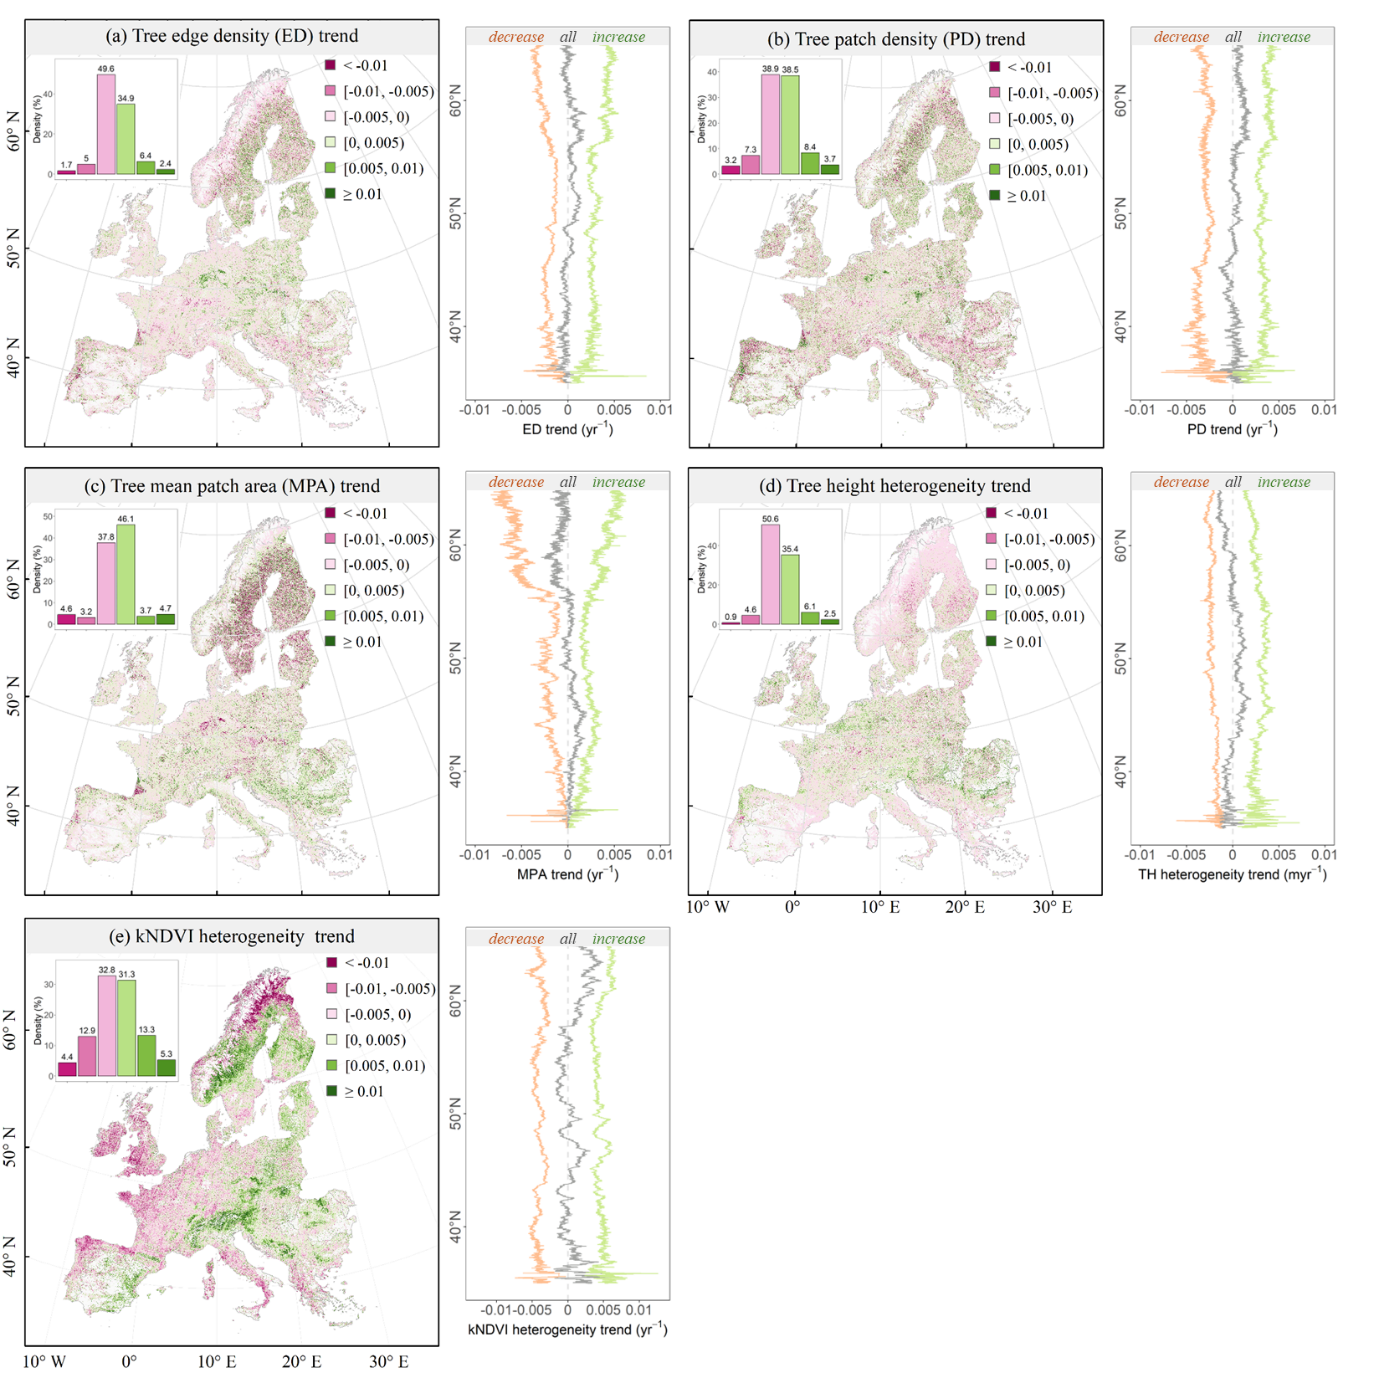


# ***Fig. S3****: Sub-metrics of tree metrics trends from 2001 to 2021*

*(a) tree edge density trend, (b) tree patch density trend, (c) tree mean patch area trend, (d) tree height heterogeneity trend, and (e) kNDVI heterogeneity trend. The tree structure dynamics within the 1 km x 1 km grid were examined for trends using the Partitioned Autoregressive Time Series (PART) approach1. Both significant and non-significant results are presented here to provide a comprehensive assessment of the observed pattern.*

# **
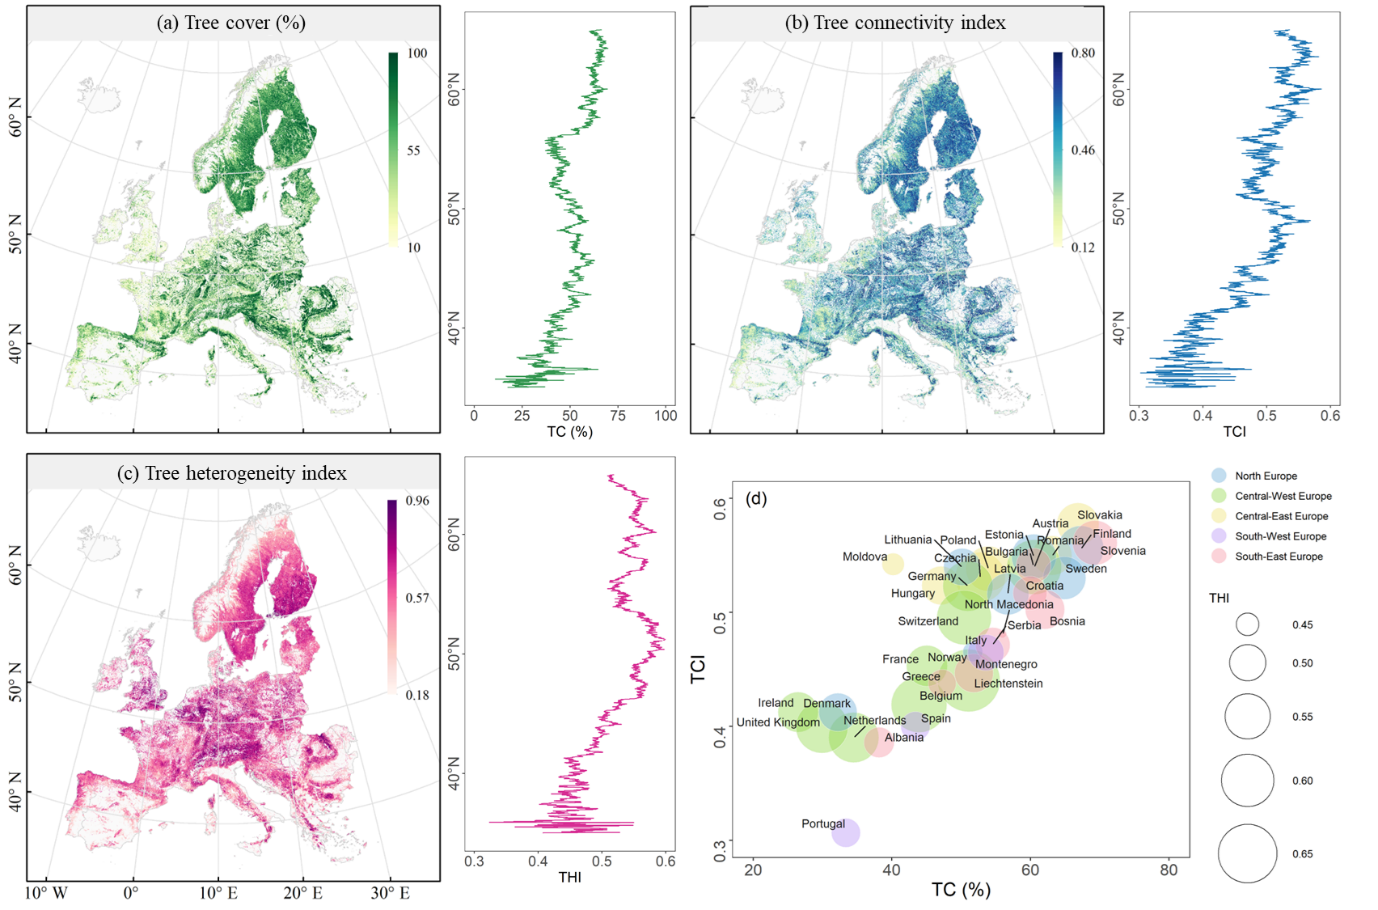
*Fig. S4****: Average tree cover, tree cover connectivity index, and tree heterogeneity index, 2001-2021*

# **
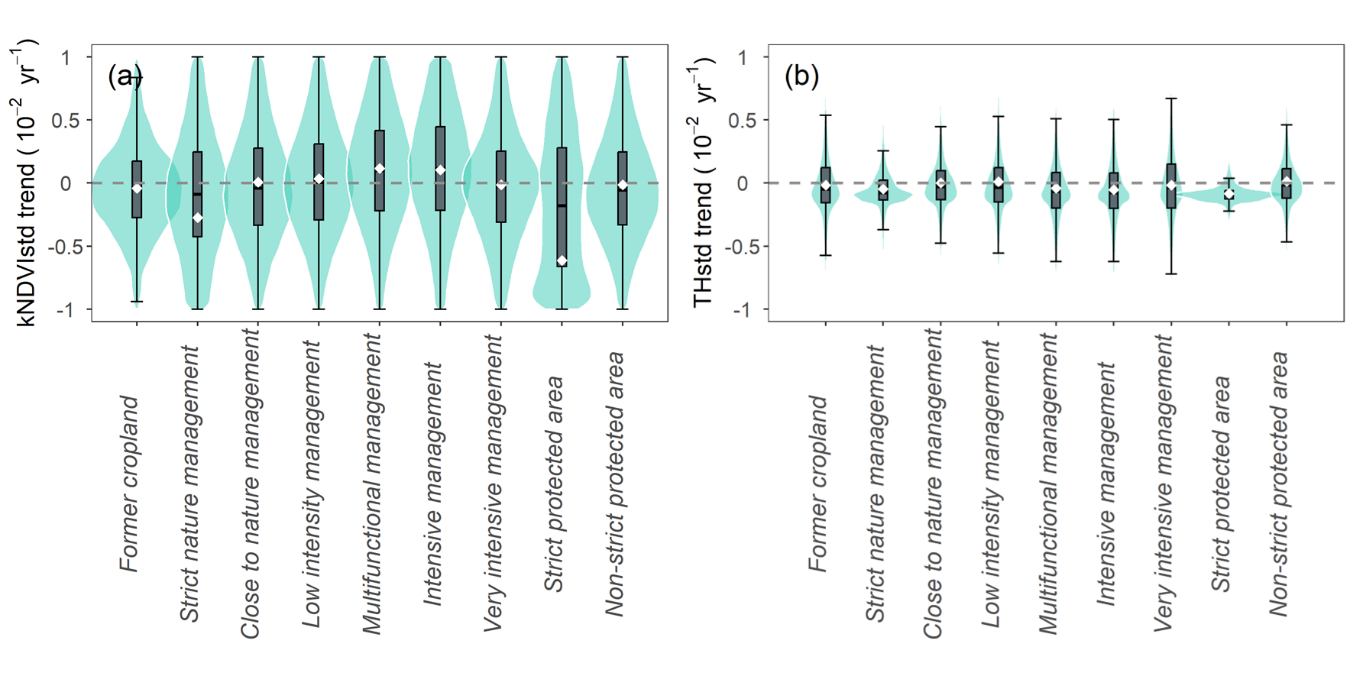
*Fig. S5****: Two sub-metrics of tree heterogeneity trends across different land managements.*

*(a) kNDVI-based spectral heterogeneity trends, (b) tree height based structural heterogeneity trends.*

# **
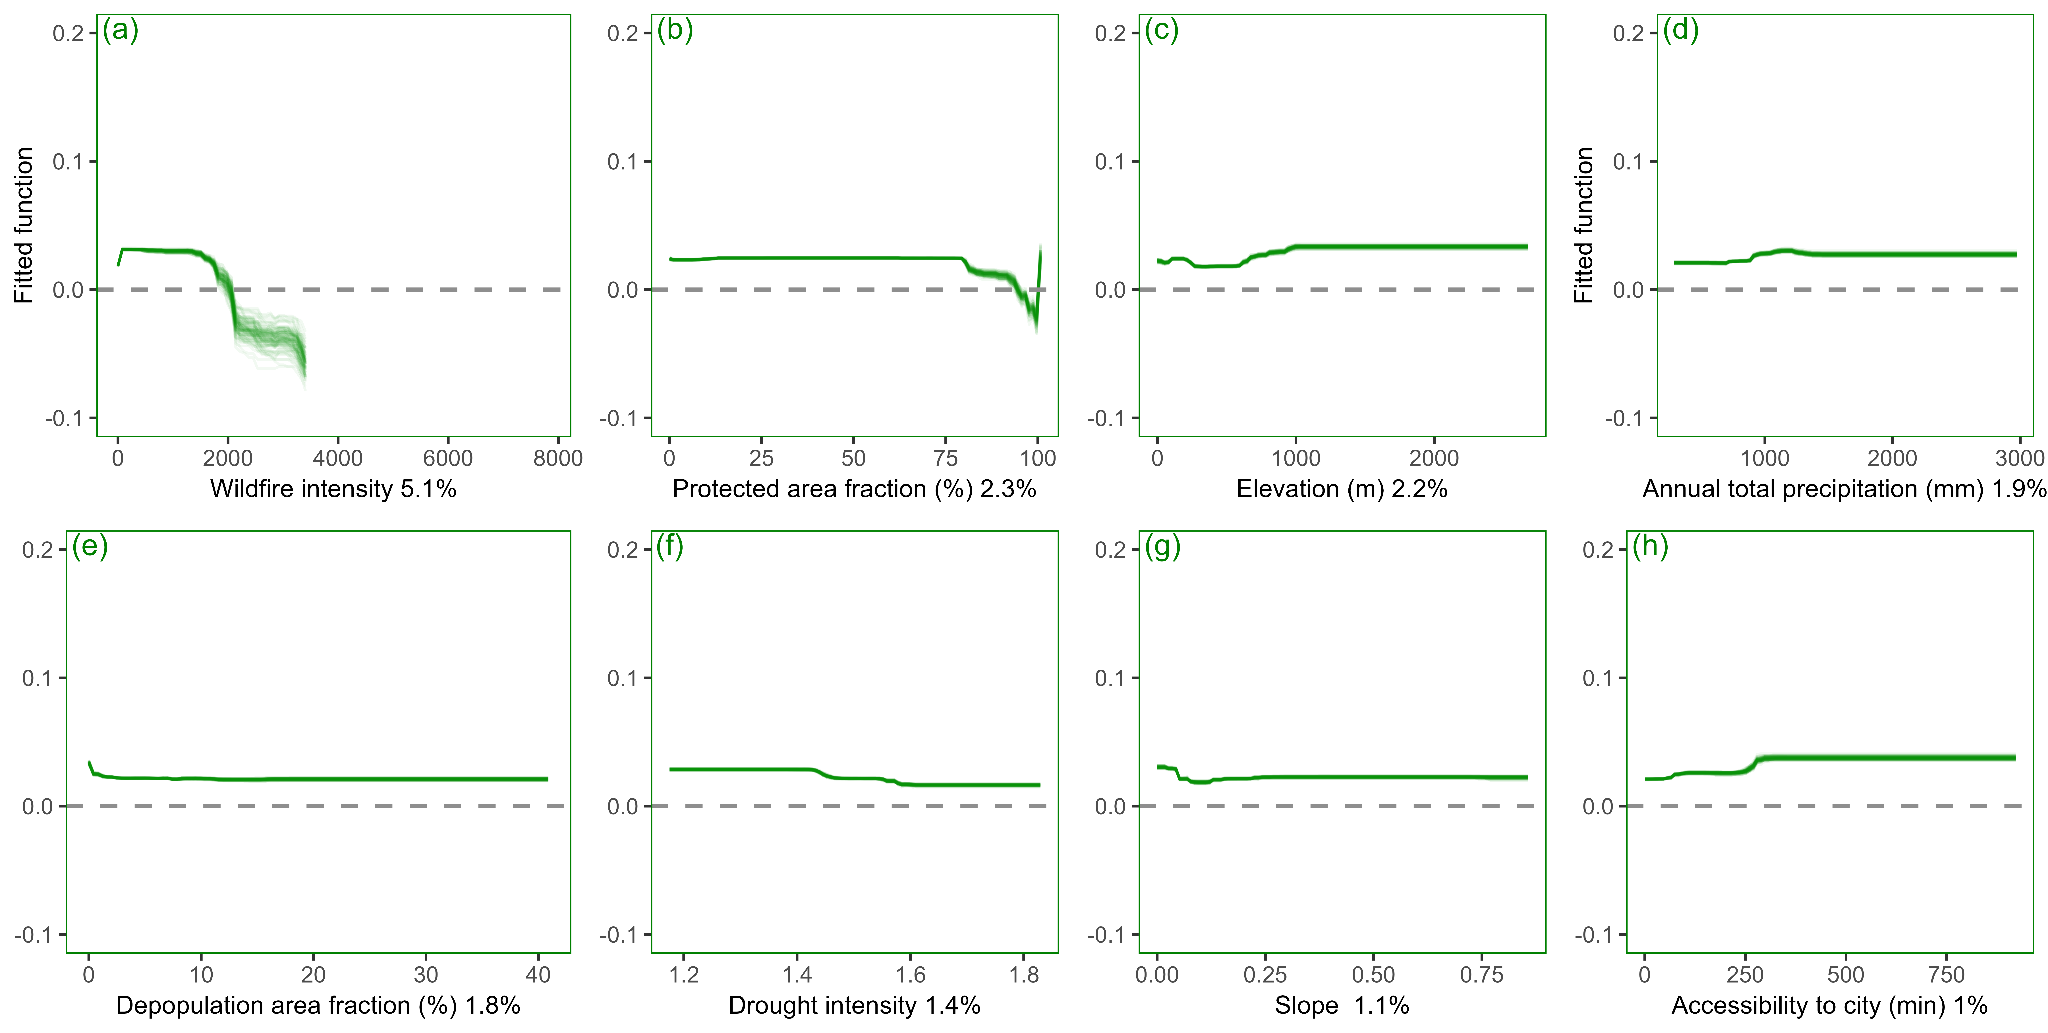
*Fig. S6****: Partial dependence plots for the factors affecting the TC trend from 2001 to 2021*

*Each line denotes the fitted function for one of the 99 runs.*

# **
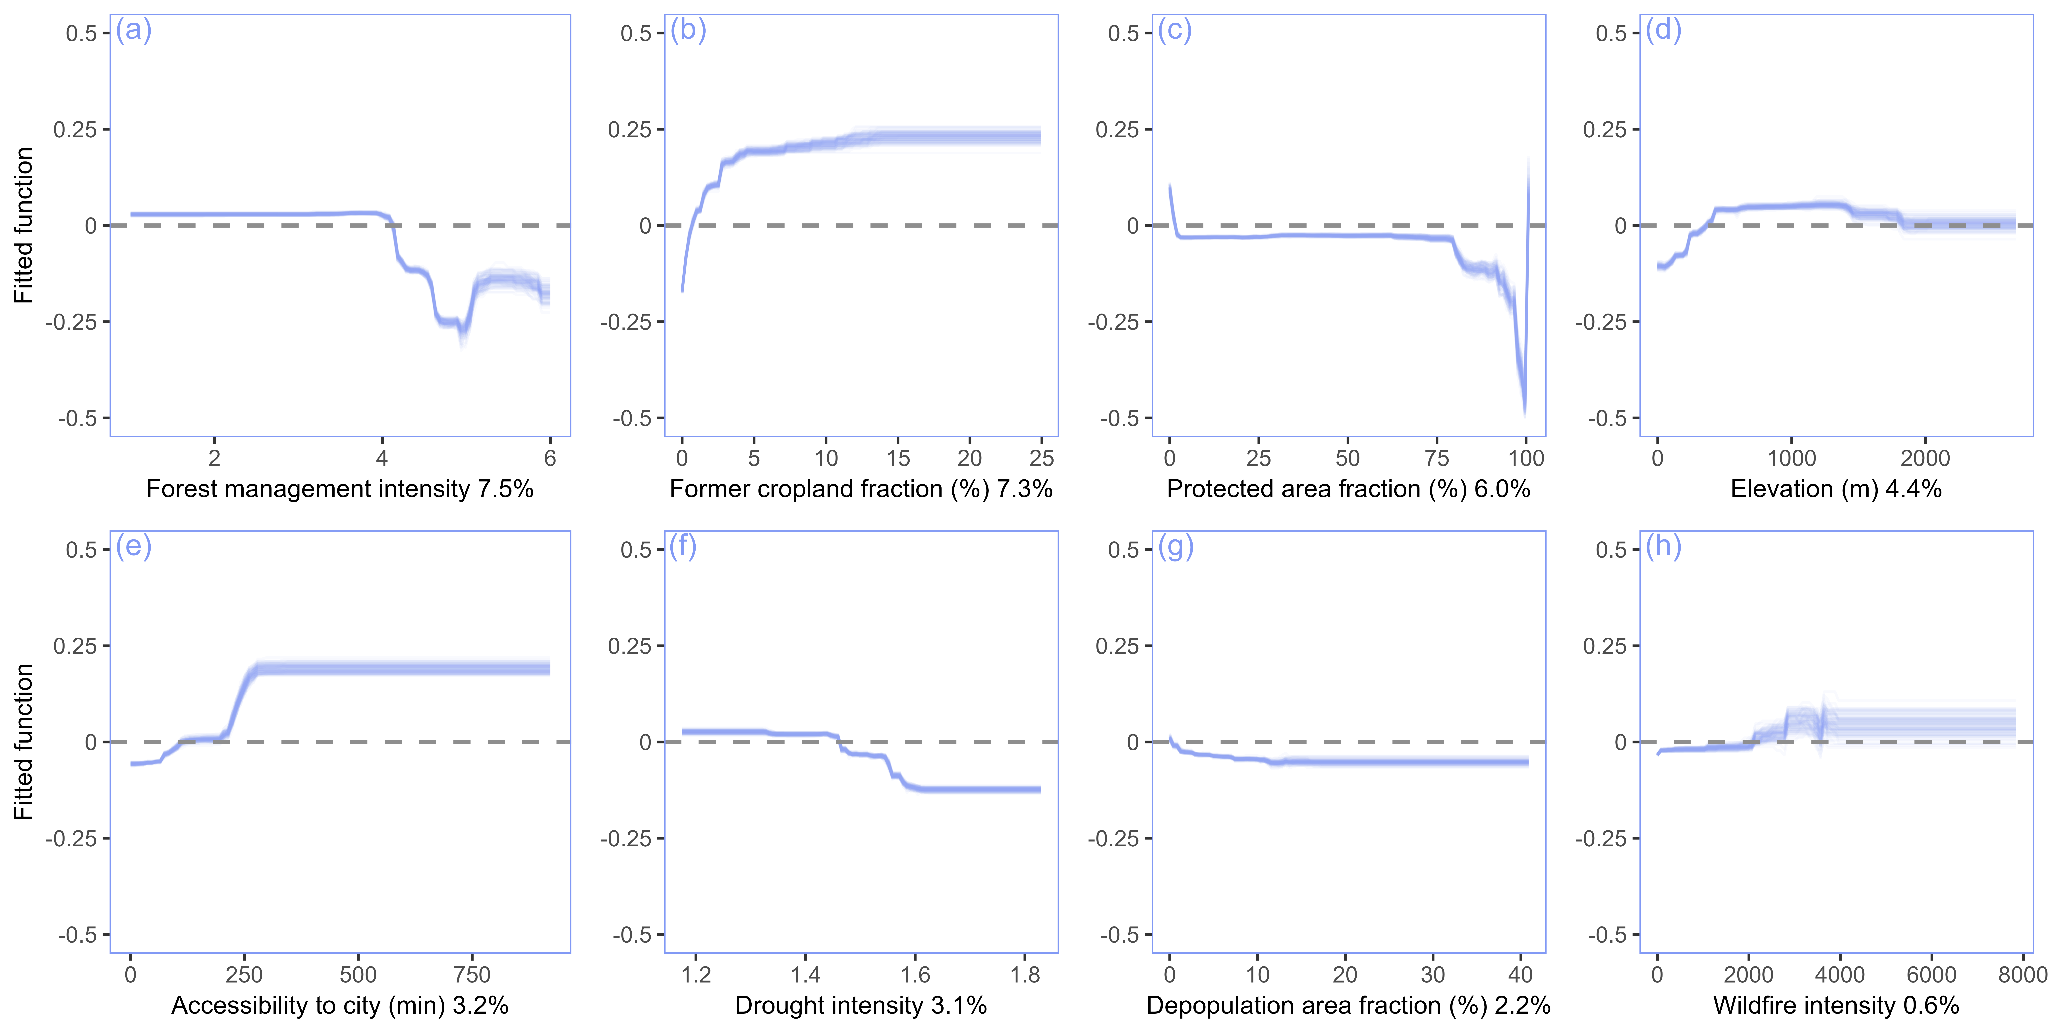
*Fig. S7****: Partial dependence plots for the factors affecting the TCI trend from 2001 to 2021*

*Each line denotes the fitted function for one of the 99 runs.*

# **
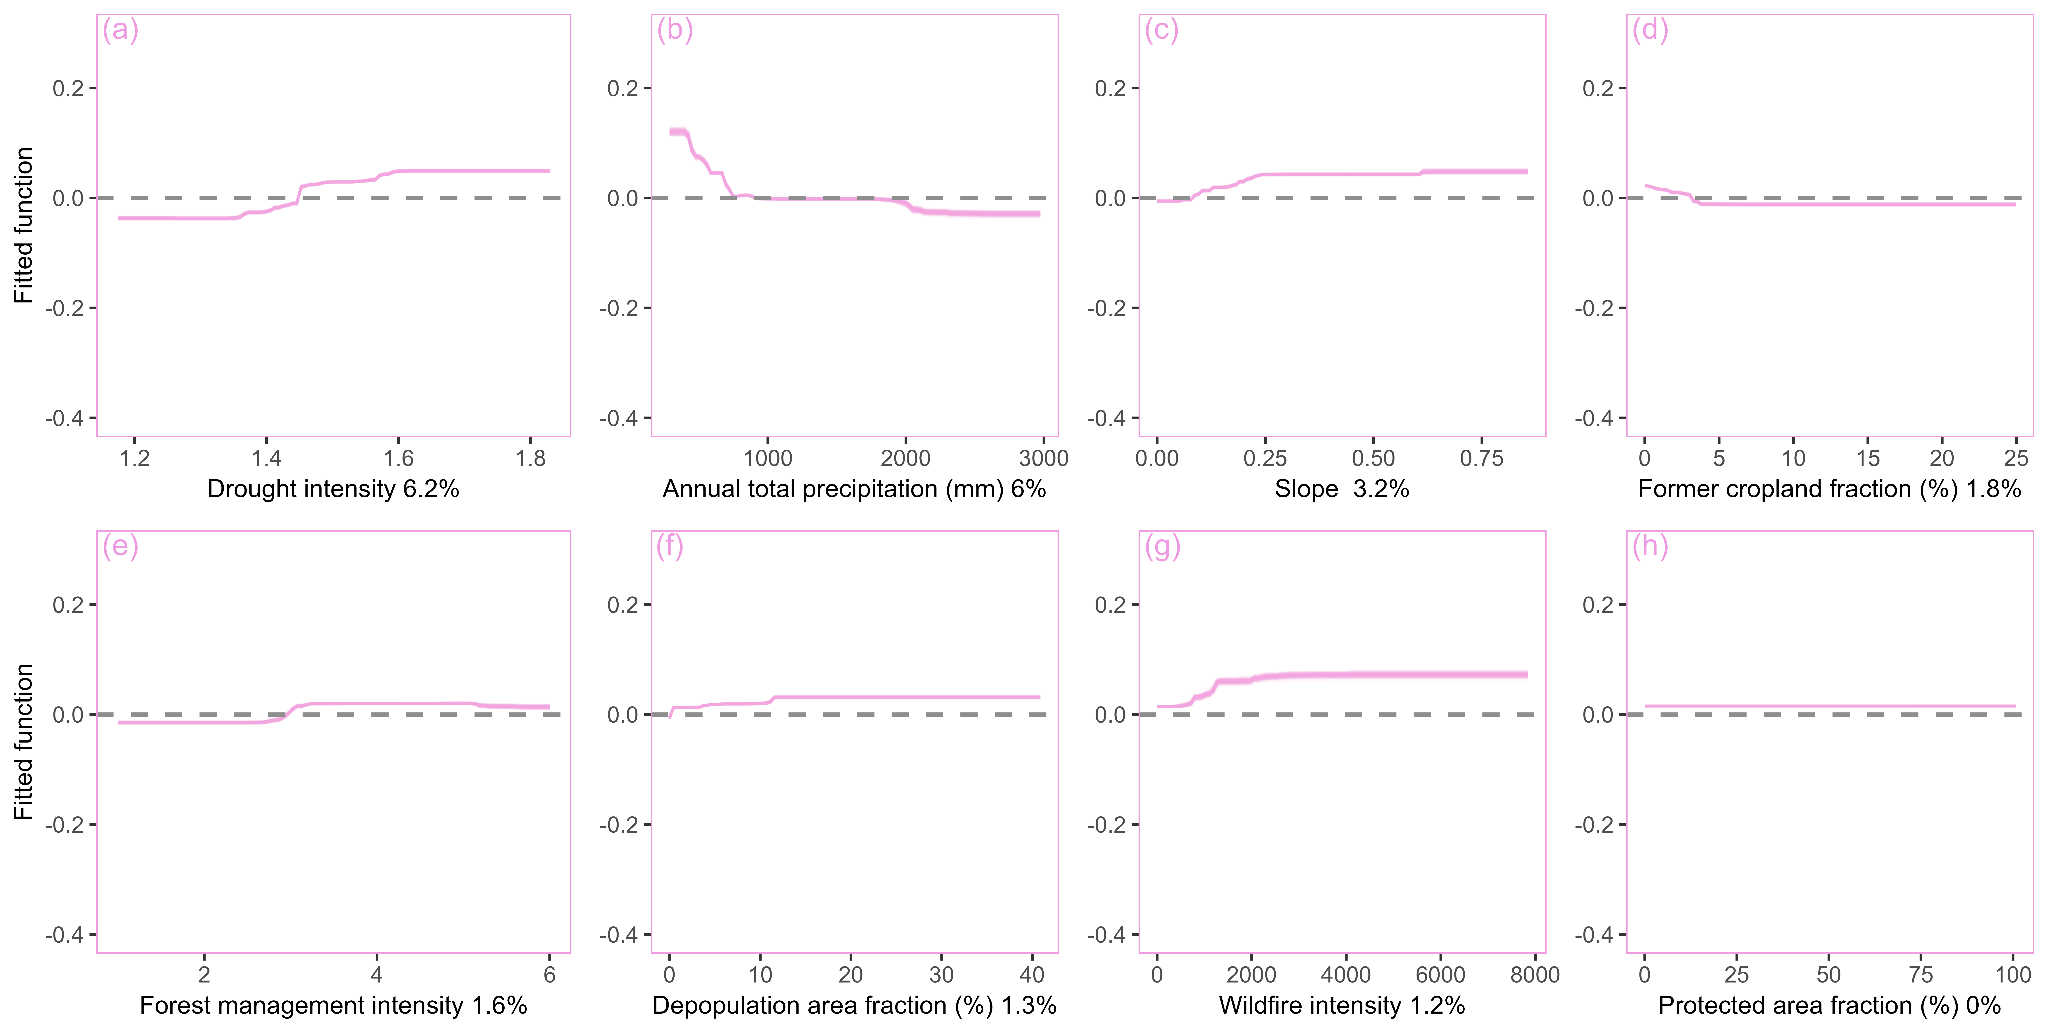
*Fig. S8****: Partial dependence plots for the factors affecting the THI trend from 2001 to 2021*

*Each line denotes the fitted function for one of the 99 runs.*


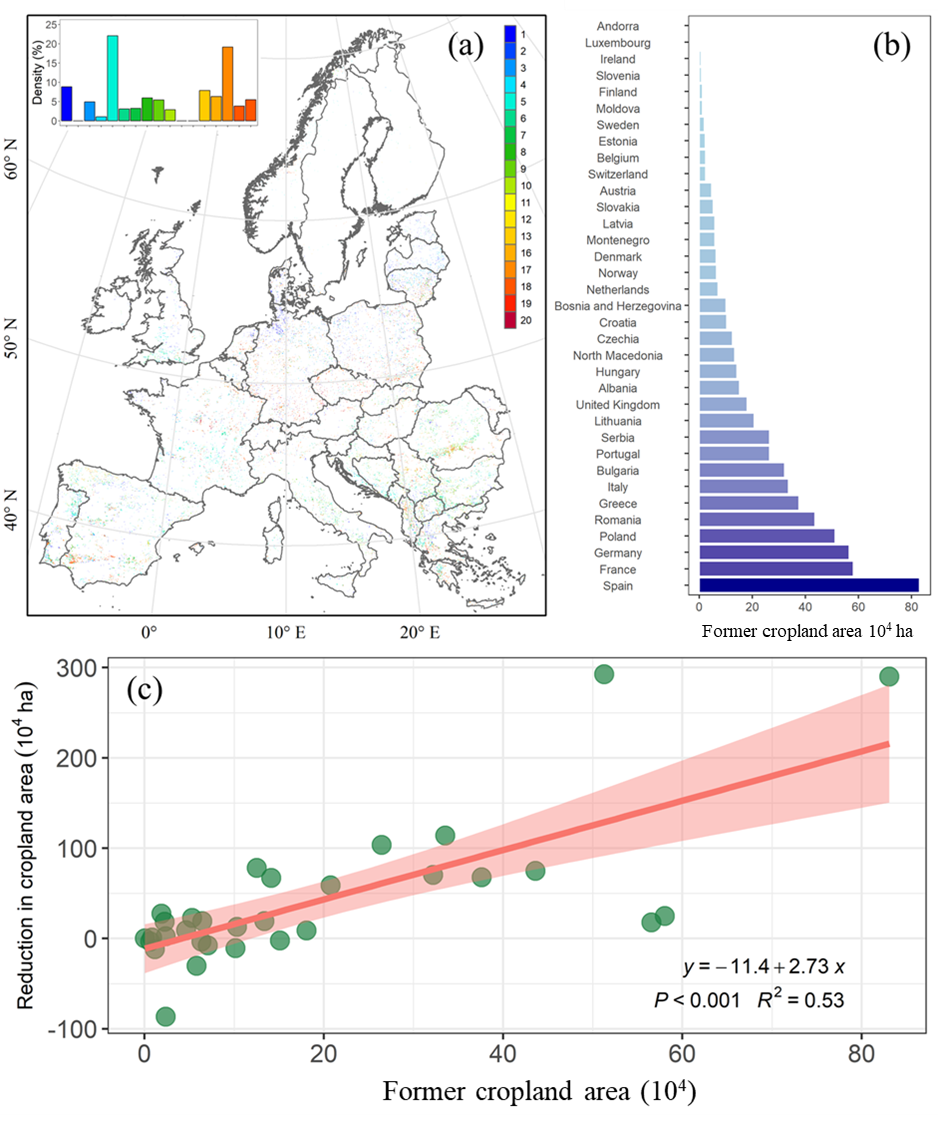


# ***Fig. S9****: Distribution of former cropland and its comparison with cropland area reduction*

*(a) illustrates the fraction of former cropland in 5 km × 5 km grid size (the original former cropland map was in 300 m resolution, here we use 5 km former cropland area fraction for better visualization), and (b) displays the areas per country scale of former cropland. (c) relationship between former cropland from 1996 to 2021 and the decrease in cropland during the same period at a national level.*


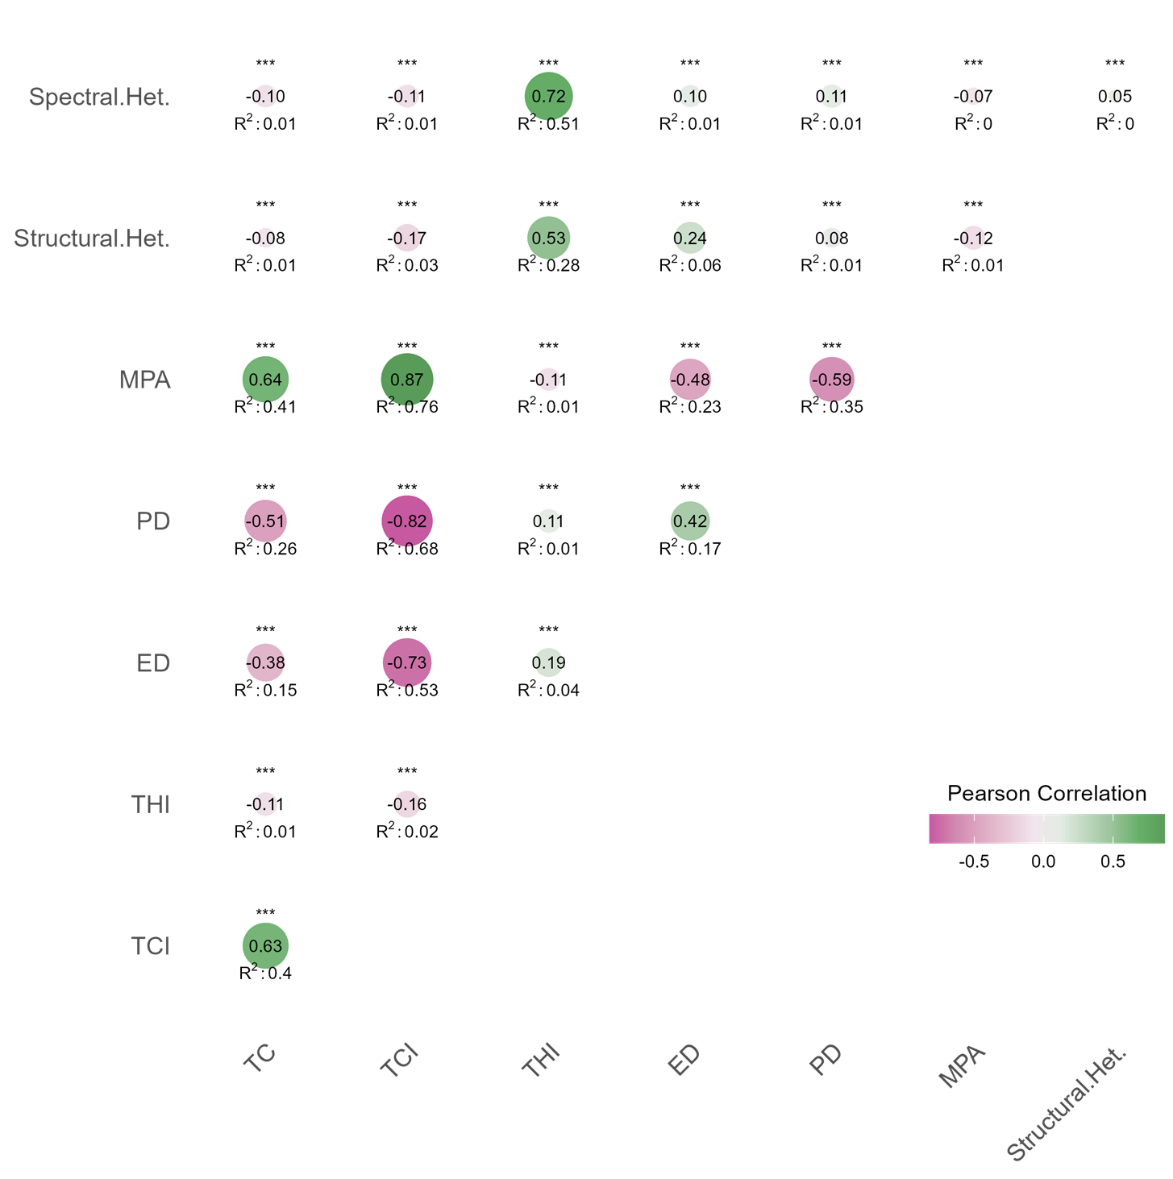


# ***Fig. S10****: Correlation coefficients among different tree metrics metrics trends*

*Including tree cover (TC), tree connectivity index (TCI), tree heterogeneity index (THI), tree edge density (ED), tree patch density (PD), tree mean patch area (MPA), tree height-based structural heterogeneity (Structural Het.), and kNDVI-based spectral heterogeneity (Spectral Het.).*

# ***
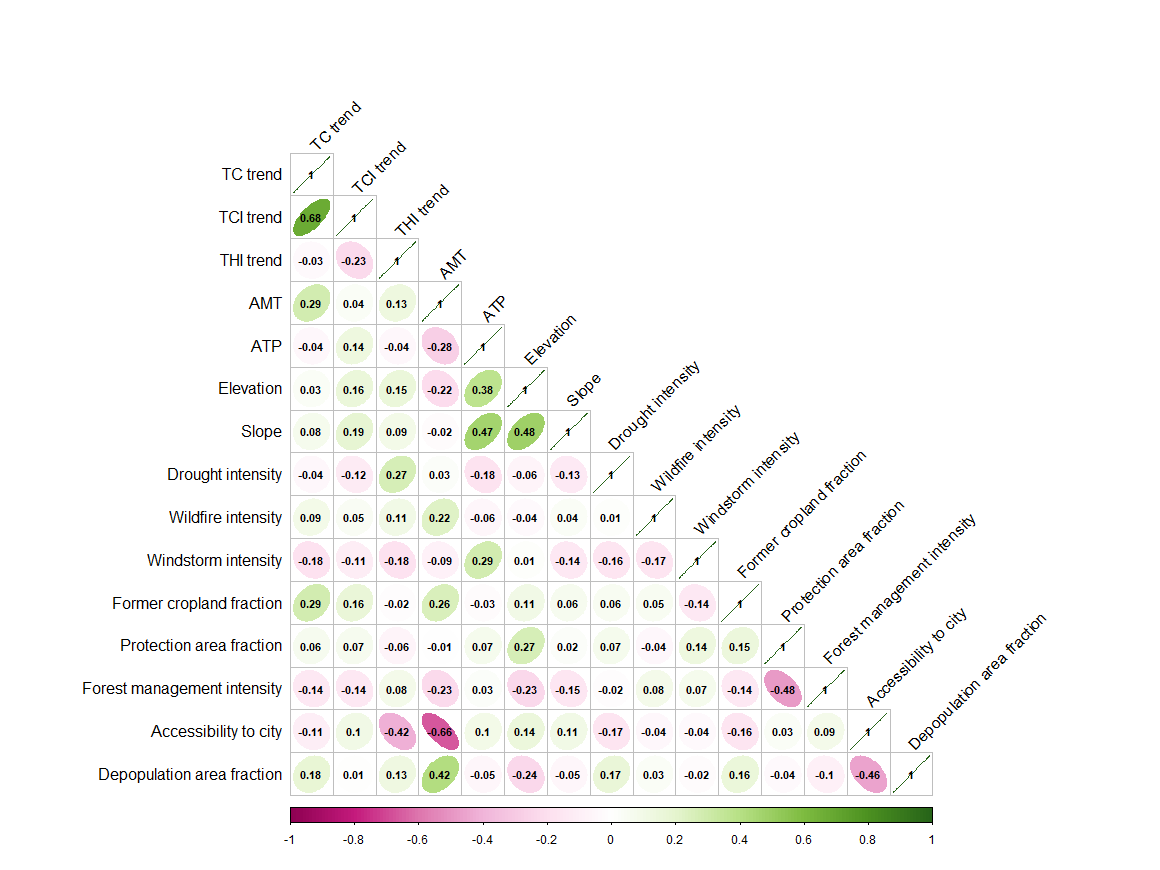
Fig. S11****: Correlation coefficients among determinant factors*

# ***
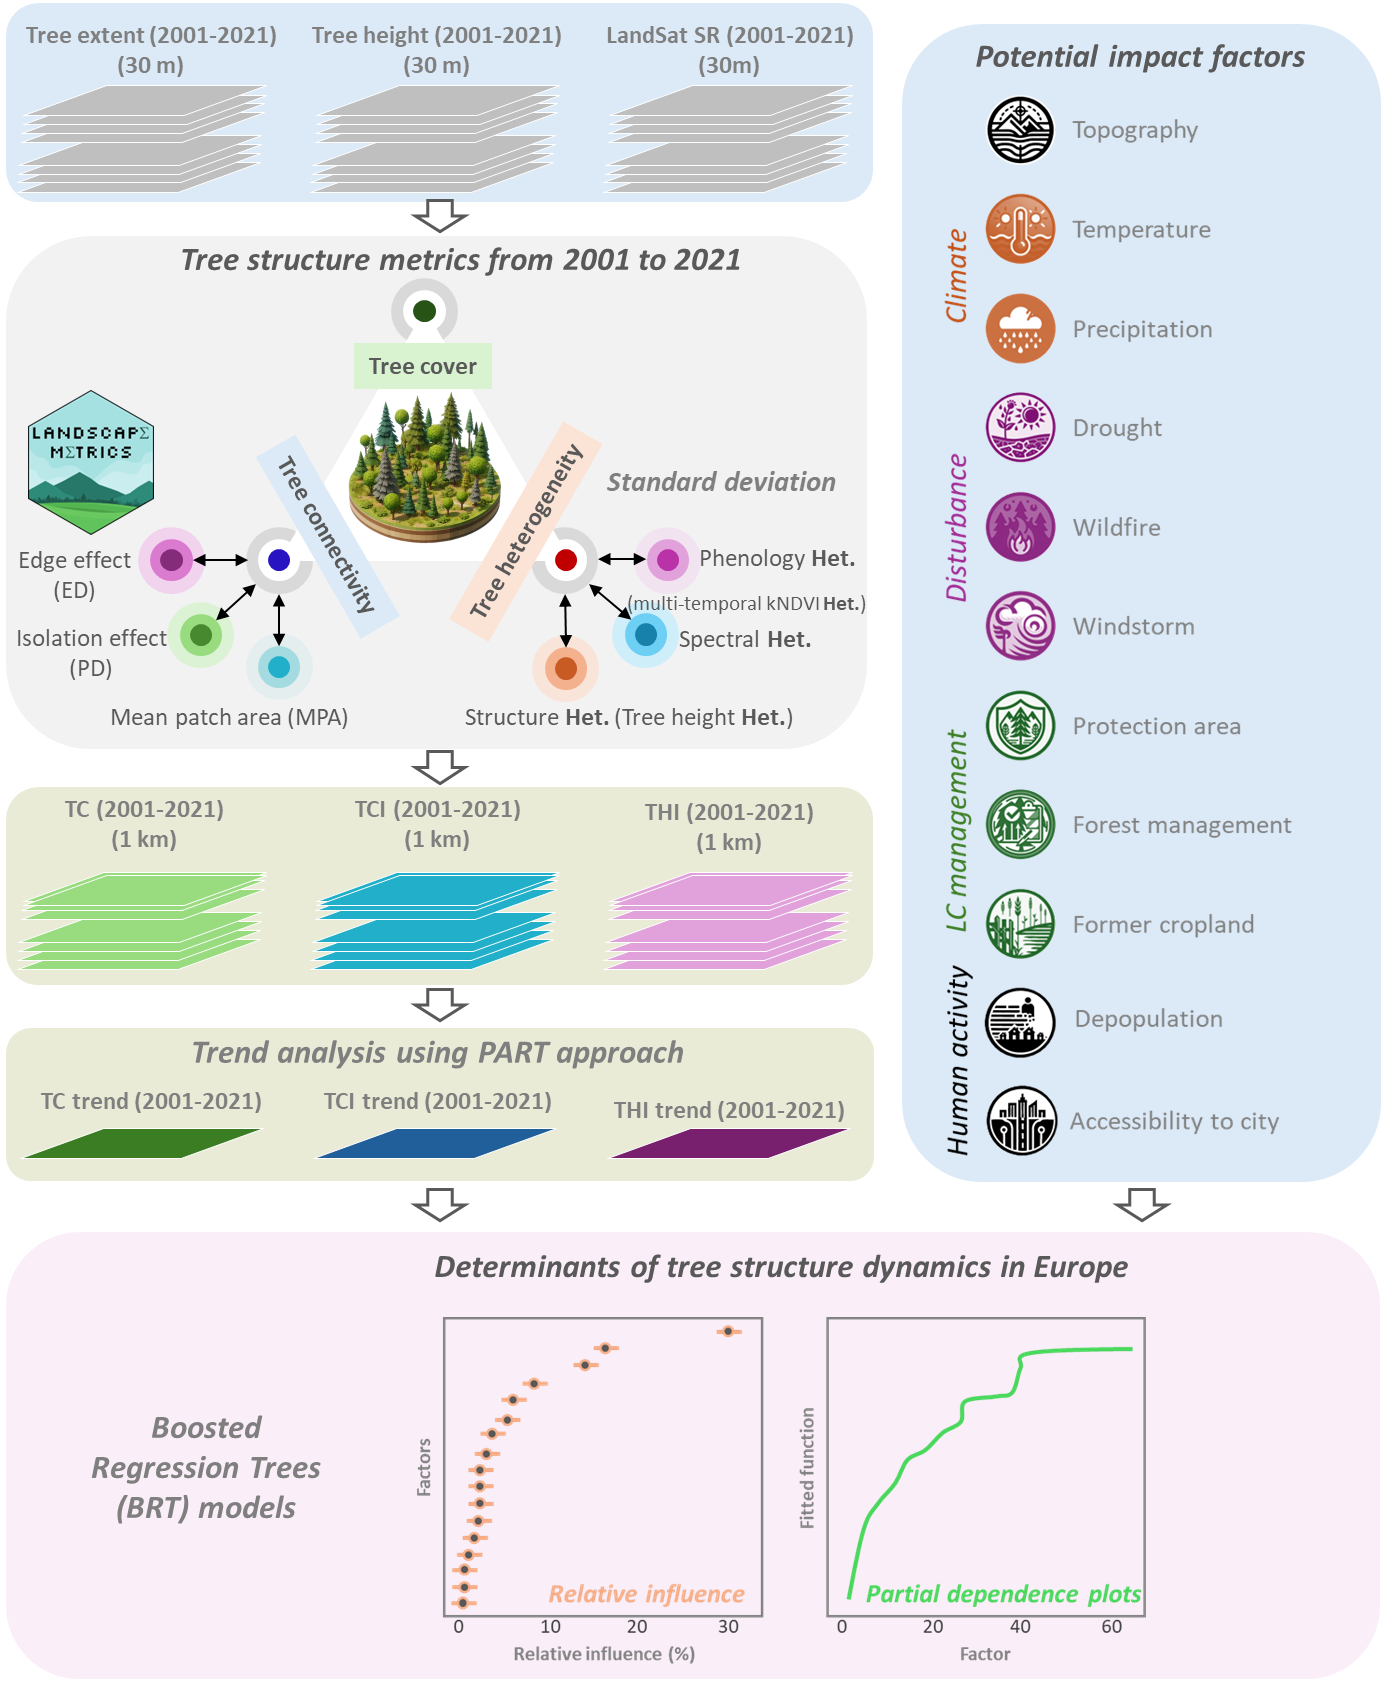
Fig. S12****: Workflow for assessing tree dynamics and their determinants across Europe.*

**Reference for supplementary material**

1 Ives, A. R. *et al.* Statistical inference for trends in spatiotemporal data. *Remote Sensing of Environment* **266**, 112678 (2021).
